# Supplementary material
Source: PubMed Central journal article supplement (PMC7391851)
Supplement: ao0c01965_si_001.pdf [file ao0c01965_si_001.pdf]

## Supporting Information

for

Synthesis of Bio-Based Long Chain Polyesters by Acyclic Diene Metathesis (ADMET)  
Polymerization and Tandem Hydrogenation, and Depolymerization with Ethylene

Kotohiro Nomura,\* Permpon Chaijaroen, and Mohamed Mehawed Abdellatif

Department of Chemistry, Graduate School of Science, Tokyo Metropolitan University, 1-1  
Minami Osawa, Hachioji, Tokyo 192-0397, Japan

### Contents

1. Additional polymerization results.
2. Selected NMR spectra.
3. Selected DSC thermograms.
4. Selected GPC traces before/after depolymerization.

## 1. Additional polymerization results

**Table S1.** Synthesis of saturated polyesters by tandem ADMET polymerization and hydrogenation using ruthenium-carbene catalysts.<sup>a</sup>

| run | monomer<br>(mmol) | cat. | H <sub>2</sub><br>/ MPa | time<br>/ h    | temp.<br>/ °C | yield <sup>b</sup><br>/ % | $M_n \times 10^{-4}$ <sup>c</sup> |       | $M_w/M_n$ <sup>c</sup> |       |
|-----|-------------------|------|-------------------------|----------------|---------------|---------------------------|-----------------------------------|-------|------------------------|-------|
|     |                   |      |                         |                |               |                           | before                            | after | before                 | after |
| 31  | ME1 (0.71)        | HG2  | 1.0                     | 3              | 50            | 88                        | 1.28                              | 1.38  | 1.41                   | 1.45  |
| S1  | ME1 (0.71)        | G2   | 1.0                     | 3              | 25            | 93                        | 1.16                              | 1.28  | 1.43                   | 1.42  |
| S2  | ME1 (0.71)        | HG2  | 1.0                     | 1              | 50            | 91                        | 1.11                              | 1.29  | 1.39                   | 1.38  |
| S3  | ME1 (0.71)        | G2   | 1.0                     | 1              | 50            | 88                        | 1.02                              | 1.19  | 1.44                   | 1.49  |
| S4  | ME1 (0.71)        | G2   | 0.5                     | 3              | 50            | 90                        | 1.06                              | 1.21  | 1.43                   | 1.45  |
| S5  | ME1 (0.71)        | HG2  | 0.5                     | 3              | 50            | 93                        | 1.20                              | 1.34  | 1.47                   | 1.39  |
| 33  | ME1 (2.36)        | HG2  | 1.0                     | 3              | 25            | 94                        | 1.23                              | 1.32  | 1.46                   | 1.48  |
| 32  | ME1 (2.36)        | HG2  | 1.0                     | 3              | 50            | 90                        | 1.64                              | 1.66  | 1.51                   | 1.48  |
| 34  | ME2 (0.65)        | HG2  | 1.0                     | 3              | 50            | 87                        | 1.40                              | 1.59  | 1.42                   | 1.44  |
| 35  | ME2 (0.65)        | G2   | 1.0                     | 3              | 50            | 85                        | 1.19                              | 1.31  | 1.38                   | 1.28  |
| 36  | ME2 (0.65)        | HG2  | 2.0                     | 3              | 50            | 90                        | 1.32                              | 1.60  | 1.45                   | 1.49  |
| 37  | ME2 (2.08)        | HG2  | 1.0                     | 3              | 50            | 93                        | 1.37                              | 1.58  | 1.48                   | 1.53  |
| 38  | ME3 (0.65)        | G2   | 1.0                     | 3              | 50            | 93                        | 0.95                              | 1.04  | 1.41                   | 1.42  |
| 39  | ME3 (0.65)        | HG2  | 1.0                     | 3              | 50            | 92                        | 1.02                              | 1.11  | 1.38                   | 1.39  |
| 40  | ME3 (0.65)        | HG2  | 0.5                     | 3              | 50            | 90                        | 0.97                              | 1.09  | 1.37                   | 1.34  |
| 41  | ME3 (0.65)        | HG2  | 2.0                     | 3              | 50            | 91                        | 1.07                              | 1.18  | 1.34                   | 1.32  |
| S6  | ME3 (0.65)        | HG2  | 1.0                     | 3              | 25            | 88                        | 1.07                              | 1.16  | 1.39                   | 1.37  |
| S7  | ME3 (0.65)        | HG2  | 1.0                     | 1              | 50            | 91                        | 1.01                              | 1.13  | 1.32                   | 1.35  |
| S8  | ME3 (0.65)        | G2   | 1.0                     | 3 <sup>d</sup> | 50            | 90                        | 0.78                              | 0.83  | 1.32                   | 1.35  |
| S9  | ME3 (0.65)        | HG2  | 1.0                     | 3 <sup>d</sup> | 50            | 91                        | 0.91                              | 0.96  | 1.38                   | 1.32  |
| 42  | ME3 (2.08)        | HG2  | 1.0                     | 3              | 50            | 92                        | 1.09                              | 1.10  | 1.46                   | 1.53  |
| 43  | ME4 (2.09)        | HG2  | 1.0                     | 3              | 50            | 92                        | 0.86                              | 0.92  | 1.48                   | 1.51  |

<sup>a</sup>Conditions: Ru cat. 2.0 mol%, monomer 300 mg in CHCl<sub>3</sub> 0.14 mL or monomer 1000 mg in CHCl<sub>3</sub> 0.34 mL (run 32, 0.38 mL), 50 °C. ADMET polymerization 24 h, and hydrogenation 3 h after addition of Al<sub>2</sub>O<sub>3</sub>. Al<sub>2</sub>O<sub>3</sub> 5 mg (1.7 wt %, monomer 300 mg scale) or 10 mg (1.0 wt%, monomer 1000 mg scale). <sup>b</sup>Isolated yield as MeOH insoluble fraction. <sup>c</sup>GPC data in THF vs polystyrene standards. <sup>d</sup>Attempted tandem hydrogenation without adding Al<sub>2</sub>O<sub>3</sub>.

## 2. Selected NMR spectra

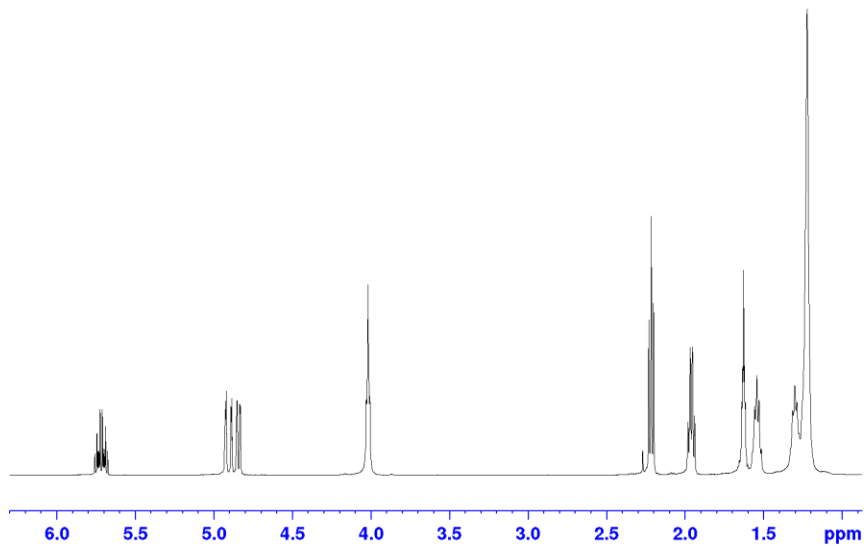

**Figure S1.**  $^1\text{H}$  NMR spectrum (in  $\text{CDCl}_3$  at  $25\text{ }^\circ\text{C}$ ) for ME1.

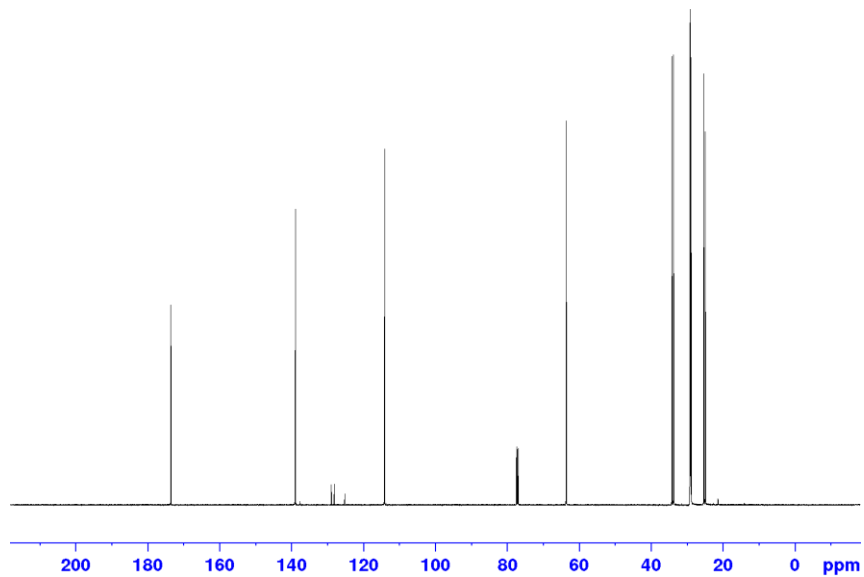

**Figure S2.**  $^{13}\text{C}$  NMR spectrum (in  $\text{CDCl}_3$  at  $25\text{ }^\circ\text{C}$ ) for ME1.

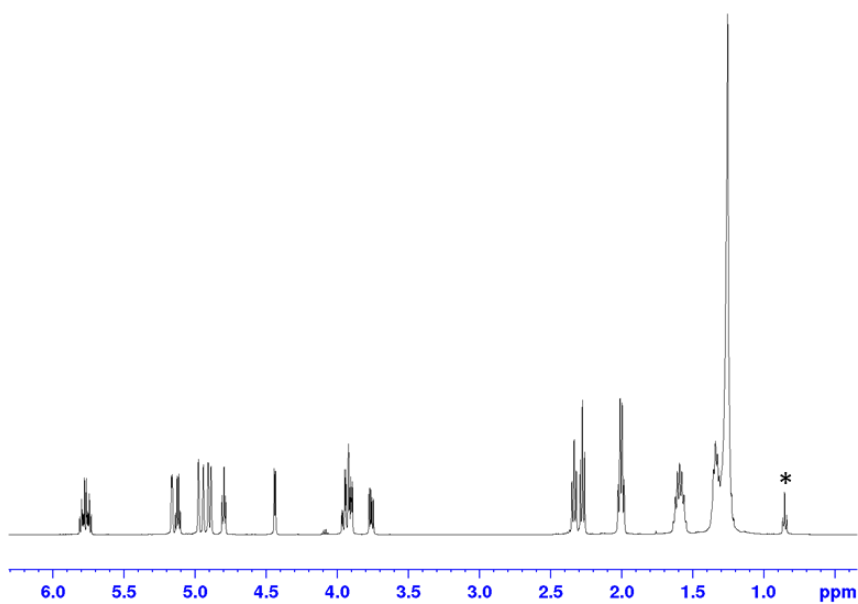

**Figure S3.**  $^1\text{H}$  NMR spectrum (in  $\text{CDCl}_3$  at  $25\text{ }^\circ\text{C}$ ) for ME2. \*impurity

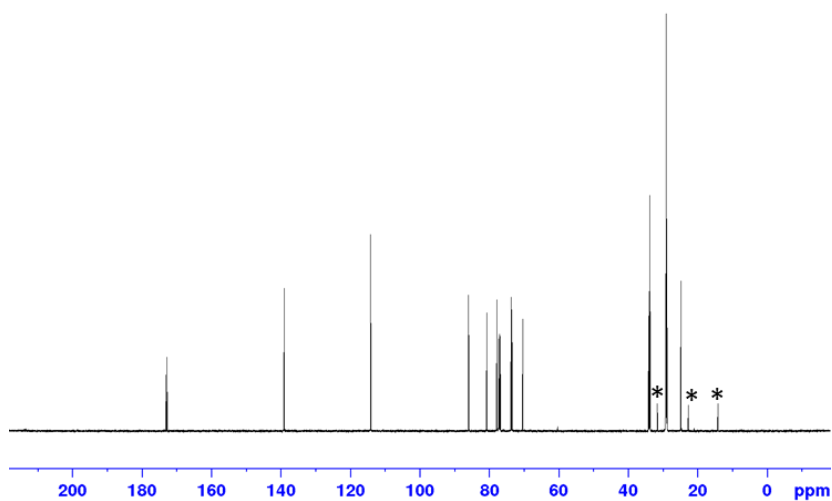

**Figure S4.**  $^{13}\text{C}$  NMR spectrum (in  $\text{CDCl}_3$  at  $25\text{ }^\circ\text{C}$ ) for ME2. \*impurity

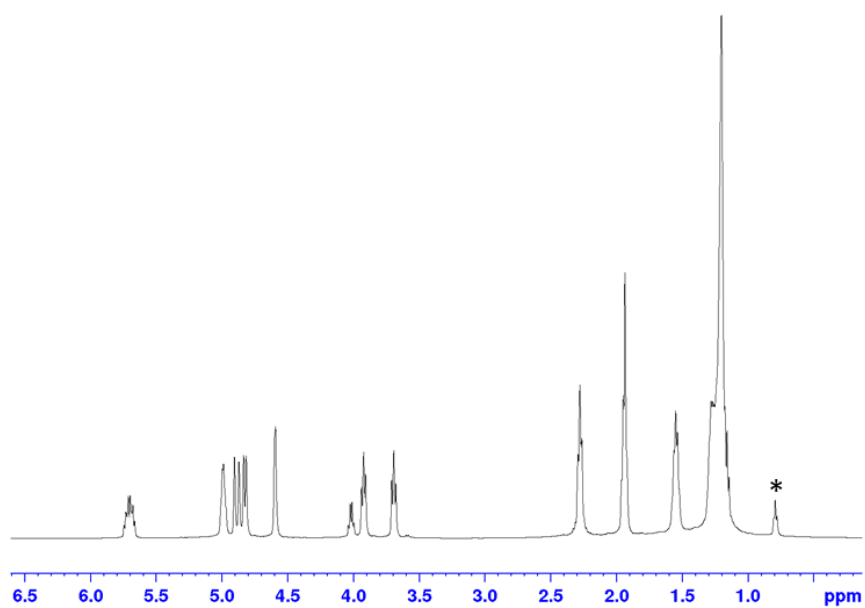

**Figure S5.**  $^1\text{H}$  NMR spectrum (in  $\text{CDCl}_3$  at  $25\text{ }^\circ\text{C}$ ) for ME3. \*impurity

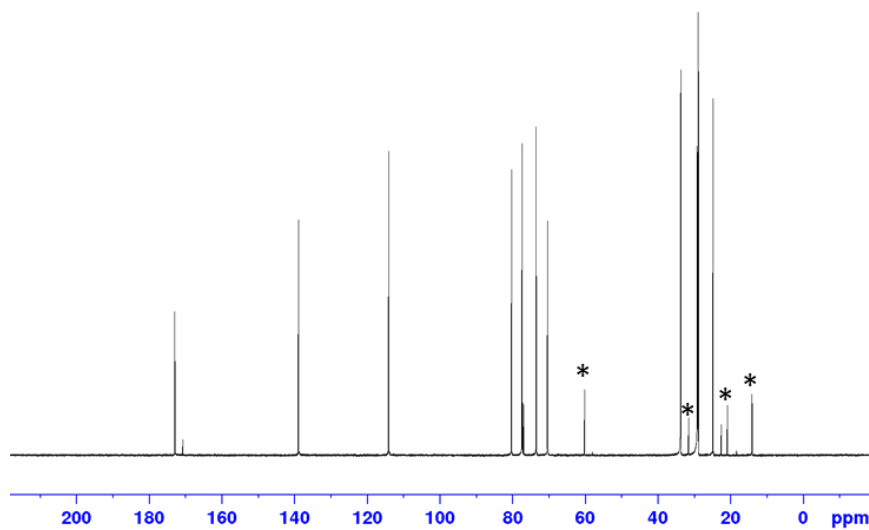

**Figure S6.**  $^{13}\text{C}$  NMR spectrum (in  $\text{CDCl}_3$  at  $25\text{ }^\circ\text{C}$ ) for ME3. \*impurity

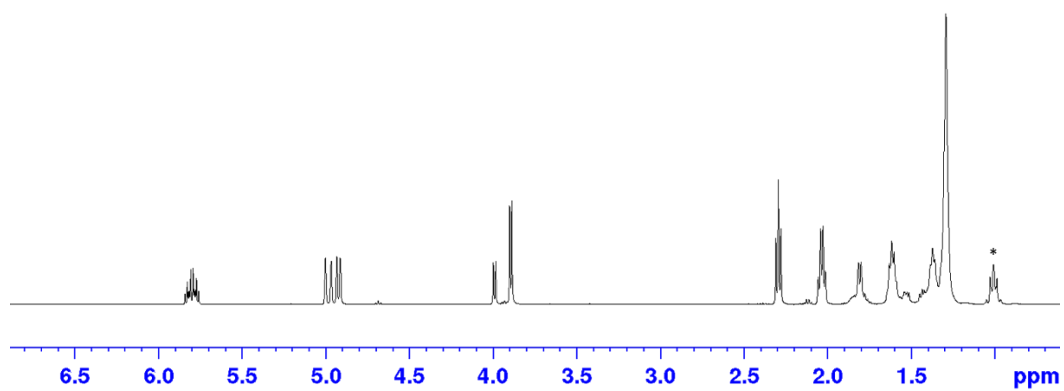

**Figure S7.**  $^1\text{H}$  NMR spectrum (in  $\text{CDCl}_3$  at  $25\text{ }^\circ\text{C}$ ) for ME4. \*impurity

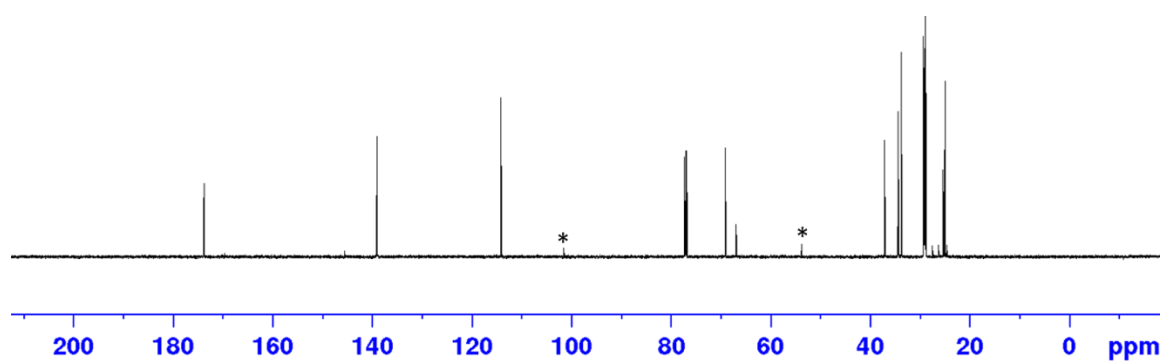

**Figure S8.**  $^{13}\text{C}$  NMR spectrum (in  $\text{CDCl}_3$  at  $25\text{ }^\circ\text{C}$ ) for ME4. \*impurity

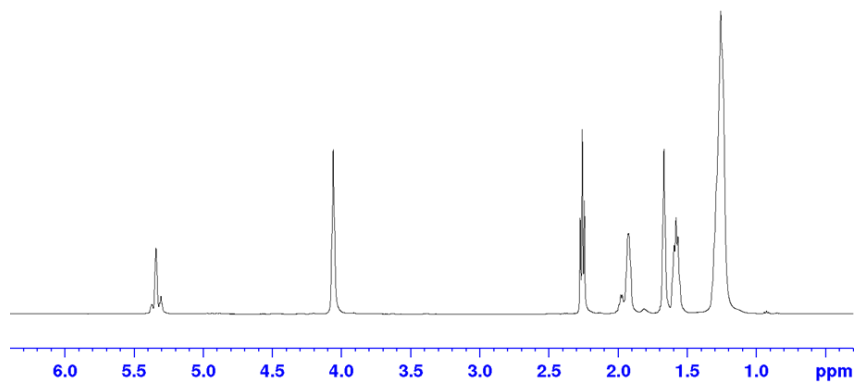

**Figure S9.**  $^1\text{H}$  NMR spectrum (in  $\text{CDCl}_3$  at  $25\text{ }^\circ\text{C}$ ) for PE1 (run 3, Table 1).

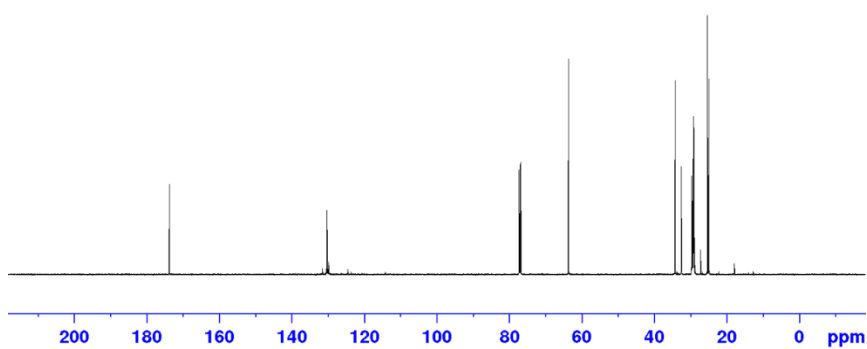

**Figure S10.**  $^{13}\text{C}$  NMR spectrum (in  $\text{CDCl}_3$  at  $25\text{ }^\circ\text{C}$ ) for PE1 (run 3, Table 1).

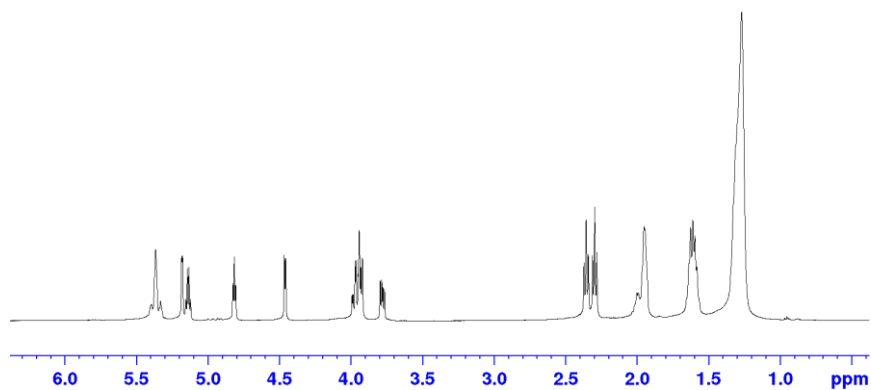

**Figure S11.**  $^1\text{H}$  NMR spectrum (in  $\text{CDCl}_3$  at  $25\text{ }^\circ\text{C}$ ) for PE2 (run 15, Table 1).

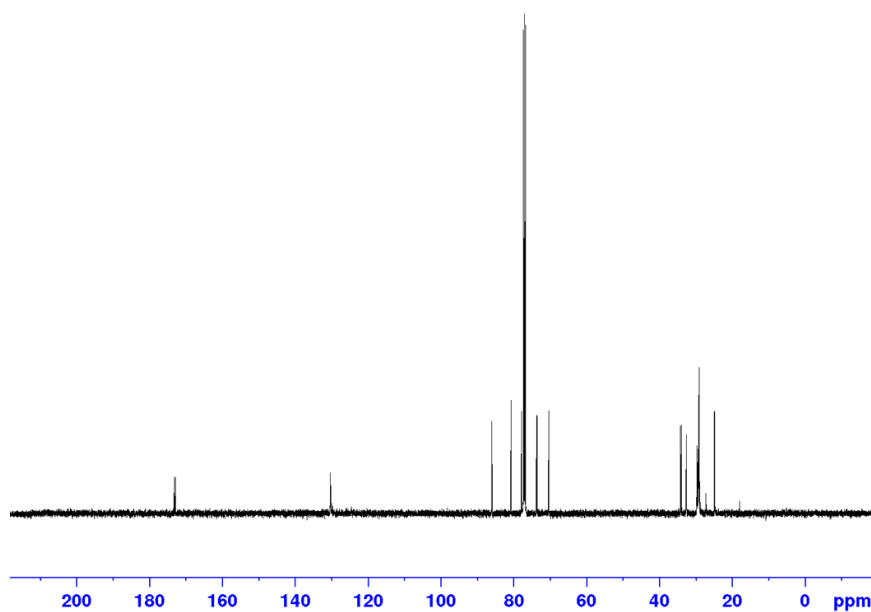

**Figure S12.**  $^{13}\text{C}$  NMR spectrum (in  $\text{CDCl}_3$  at  $25\text{ }^\circ\text{C}$ ) for PE2 (run 15, Table 1).



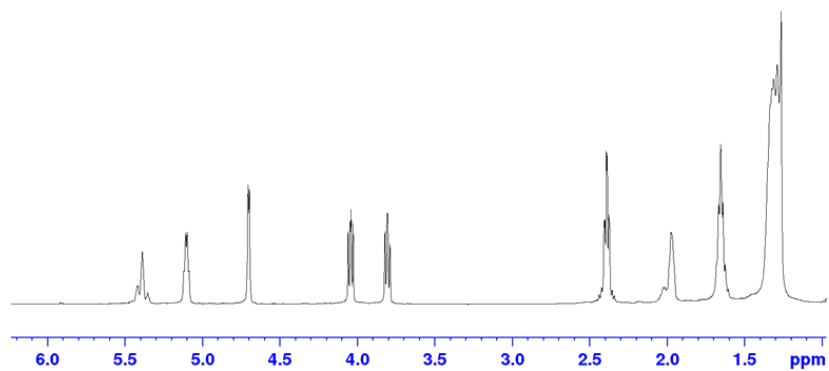

**Figure S13.**  $^1\text{H}$  NMR spectrum (in  $\text{CDCl}_3$  at  $25\text{ }^\circ\text{C}$ ) for PE3 (run 23, Table 1).

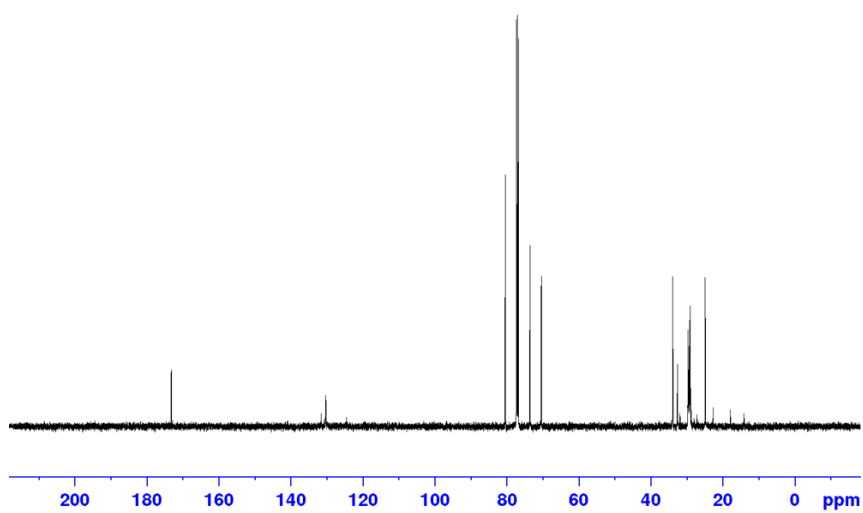

**Figure S14.**  $^{13}\text{C}$  NMR spectrum (in  $\text{CDCl}_3$  at  $25\text{ }^\circ\text{C}$ ) for PE3 (run 23, Table 1).

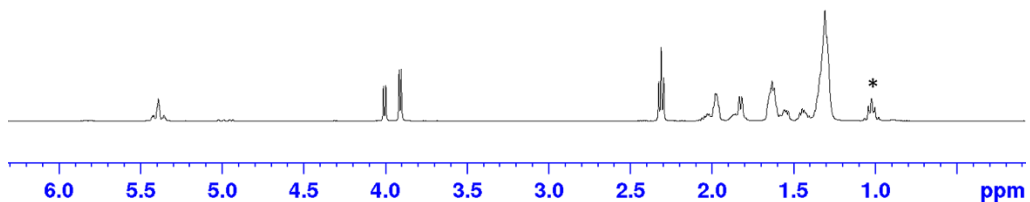

**Figure S15.**  $^1\text{H}$  NMR spectrum (in  $\text{CDCl}_3$  at  $25\text{ }^\circ\text{C}$ ) for PE4 (run 29, Table 1). \*impurity

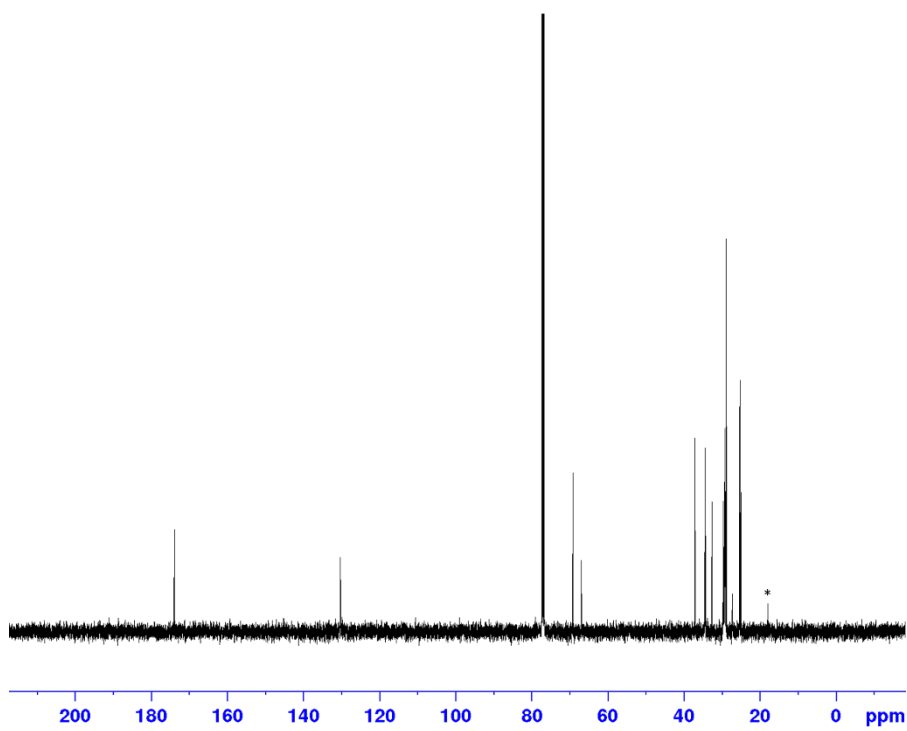

**Figure S16.**  $^{13}\text{C}$  NMR spectrum (in  $\text{CDCl}_3$  at  $25\text{ }^\circ\text{C}$ ) for PE4 (run 29, Table 1). \*impurity

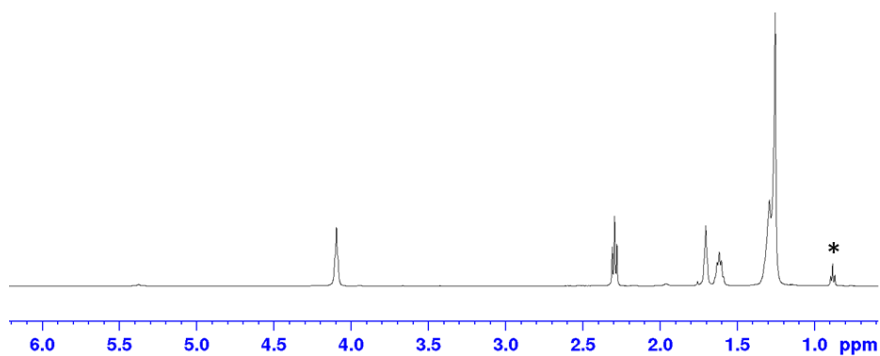

**Figure S17.**  $^1\text{H}$  NMR spectrum (in  $\text{CDCl}_3$  at  $25\text{ }^\circ\text{C}$ ) for HPE1 (run 33, Table 2). \*impurity

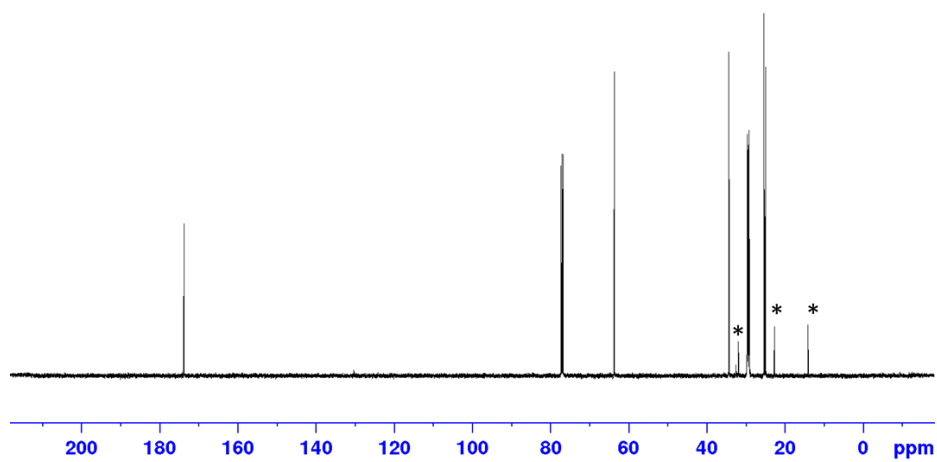

**Figure S18.**  $^{13}\text{C}$  NMR spectrum (in  $\text{CDCl}_3$  at  $25\text{ }^\circ\text{C}$ ) for HPE1 (run 33, Table 2). \*impurity

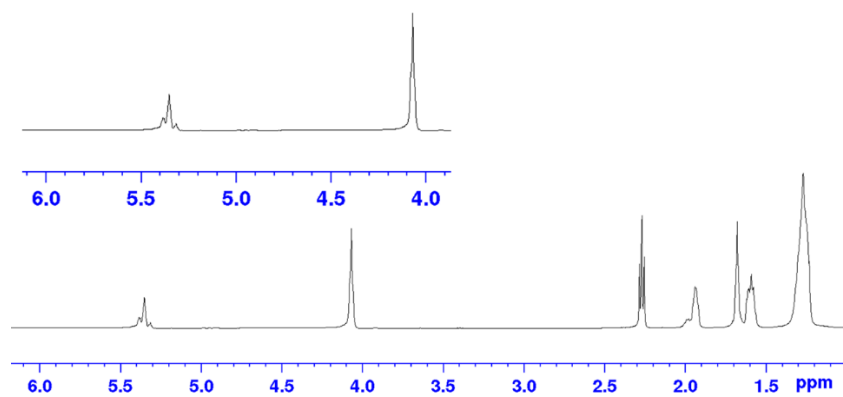

**Figure S19.**  $^1\text{H}$  NMR spectrum (in  $\text{CDCl}_3$  at  $25\text{ }^\circ\text{C}$ ) for HPE1 (run S2, Table S1-1). Incomplete hydrogenation

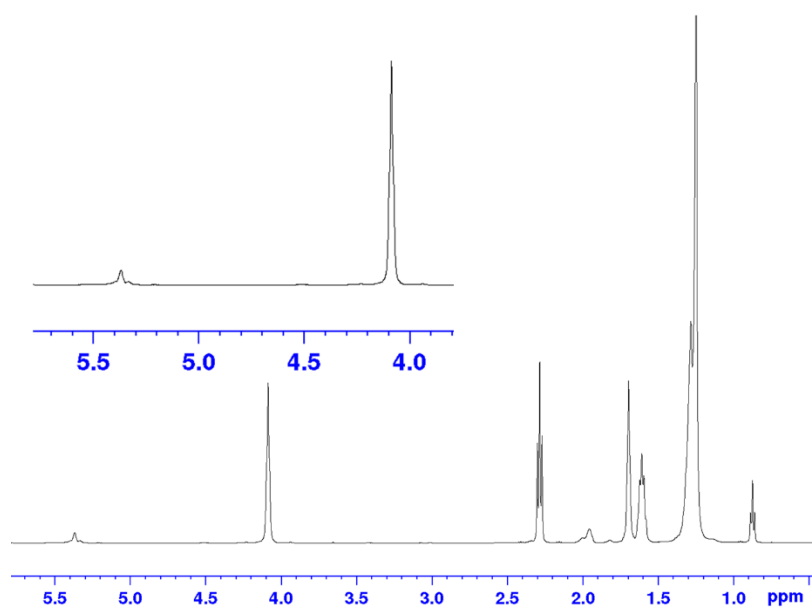

**Figure S20.**  $^1\text{H}$  NMR spectrum (in  $\text{CDCl}_3$  at  $25\text{ }^\circ\text{C}$ ) for HPE1 (run S4, Table S1-1). Incomplete hydrogenation

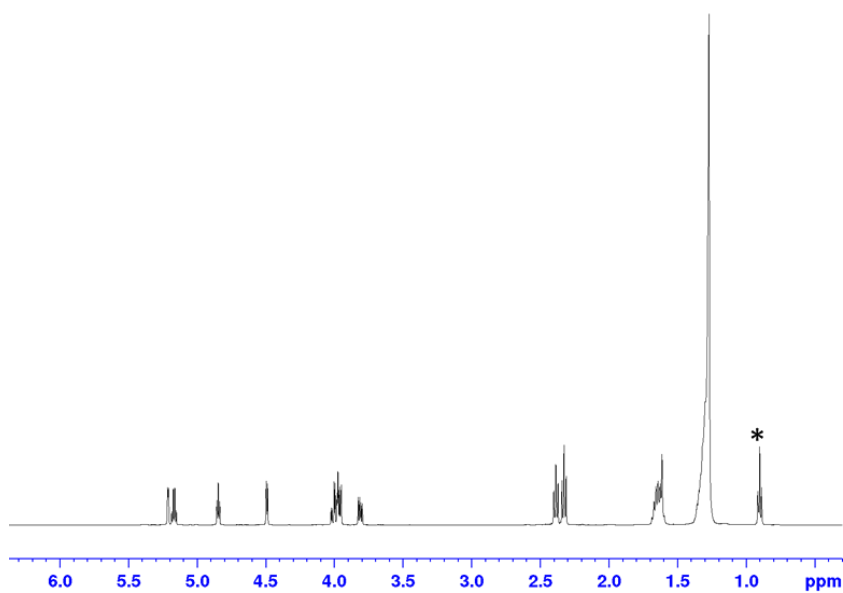

**Figure S21.**  $^1\text{H}$  NMR spectrum (in  $\text{CDCl}_3$  at  $25\text{ }^\circ\text{C}$ ) for HPE2 (run 37, Table 2). \*impurity

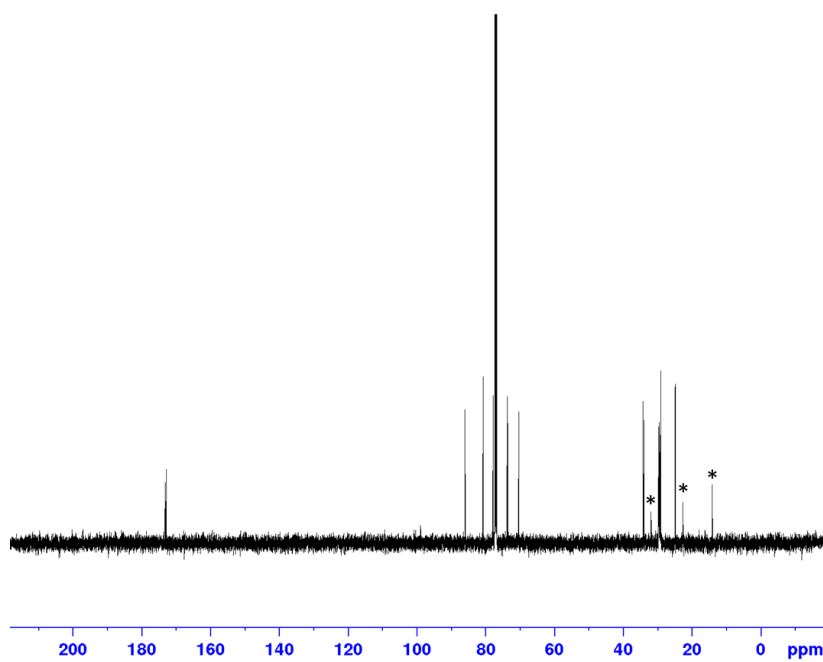

**Figure S22.**  $^{13}\text{C}$  NMR spectrum (in  $\text{CDCl}_3$  at  $25\text{ }^\circ\text{C}$ ) for HPE2 (run 37, Table 2). \*impurity

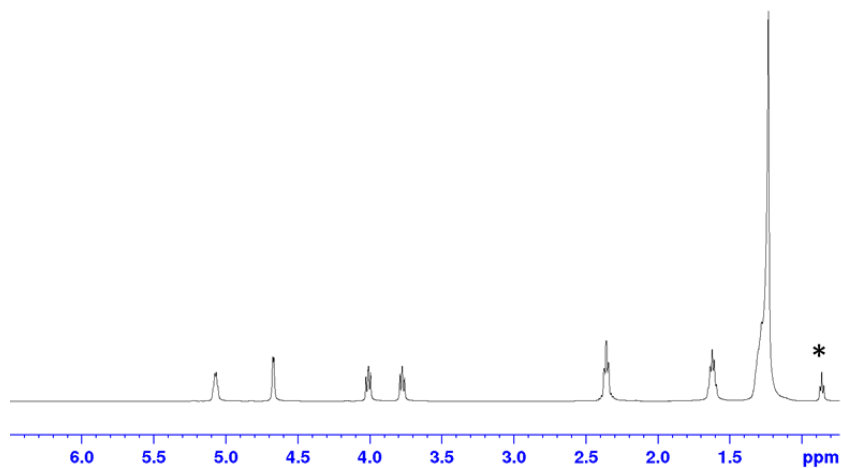

**Figure S23.**  $^1\text{H}$  NMR spectrum (in  $\text{CDCl}_3$  at  $25\text{ }^\circ\text{C}$ ) for HPE3 (under  $2.0\text{ MPa H}_2$ , run 41, Table 2). \*impurity

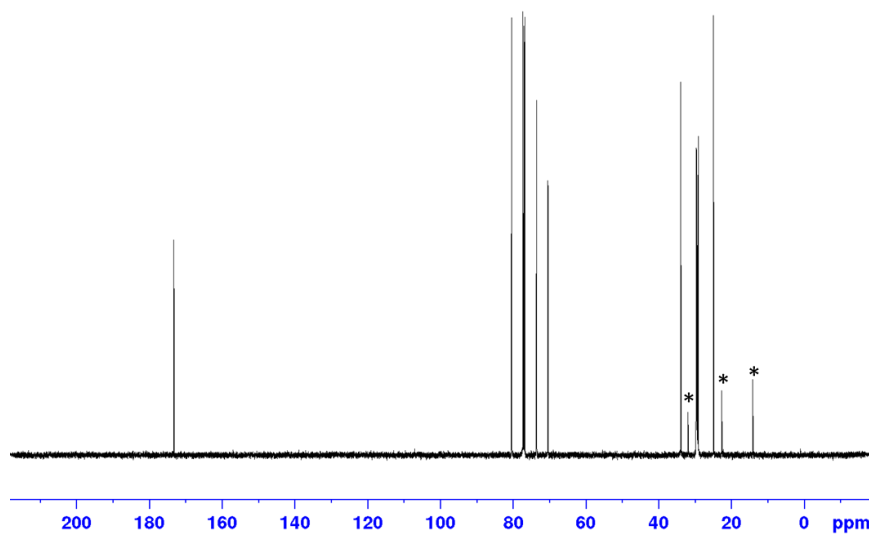

**Figure S24.**  $^{13}\text{C}$  NMR spectrum (in  $\text{CDCl}_3$  at  $25\text{ }^\circ\text{C}$ ) for HPE3 (under  $2.0\text{ MPa H}_2$ , run 41, Table 2). \*impurity

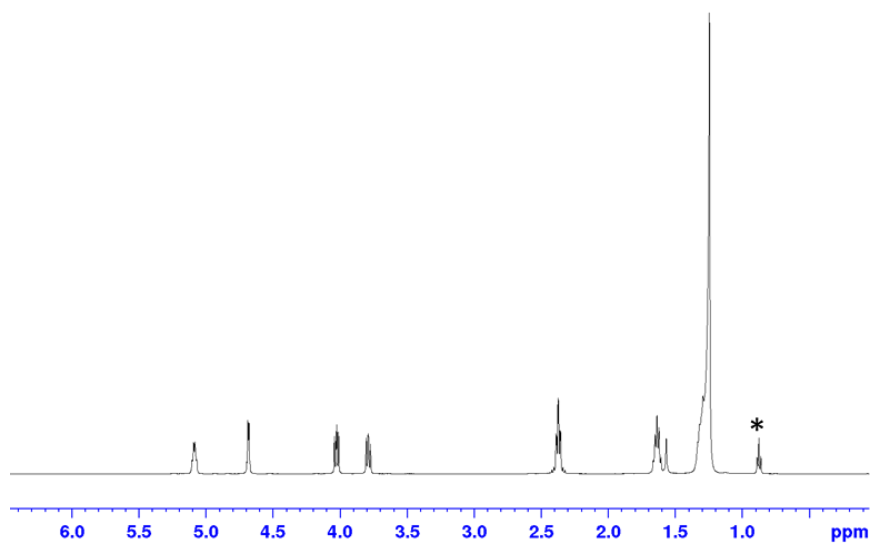

**Figure S25.**  $^1\text{H}$  NMR spectrum (in  $\text{CDCl}_3$  at  $25\text{ }^\circ\text{C}$ ) for HPE3 (under  $1.0\text{ MPa H}_2$ , run 39, Table 2). \*impurity

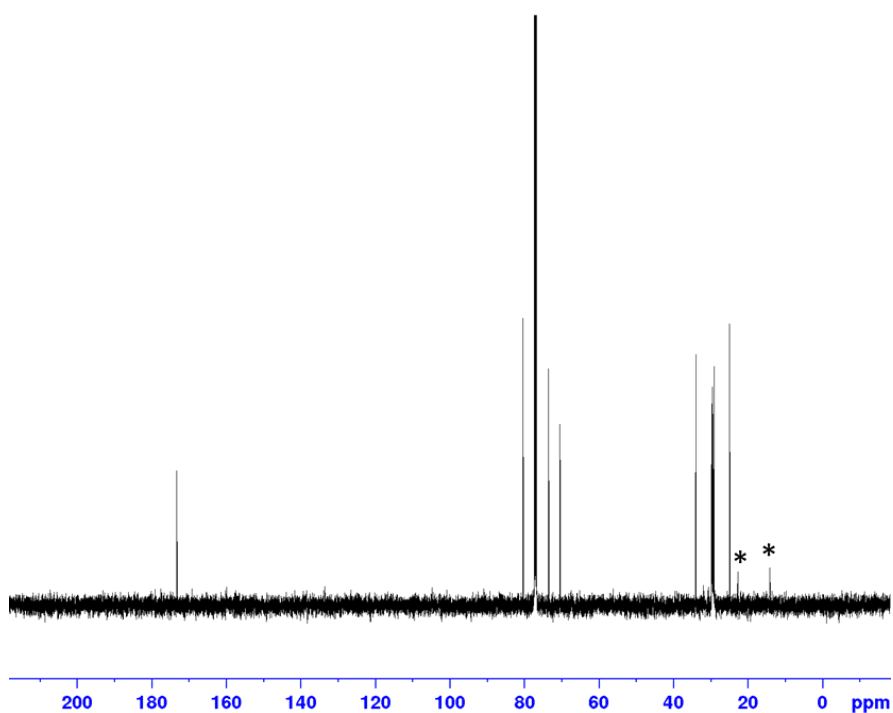

**Figure S26.**  $^{13}\text{C}$  NMR spectrum (in  $\text{CDCl}_3$  at  $25\text{ }^\circ\text{C}$ ) for HPE3 (under  $1.0\text{ MPa H}_2$ , run 39, Table 2). \*impurity

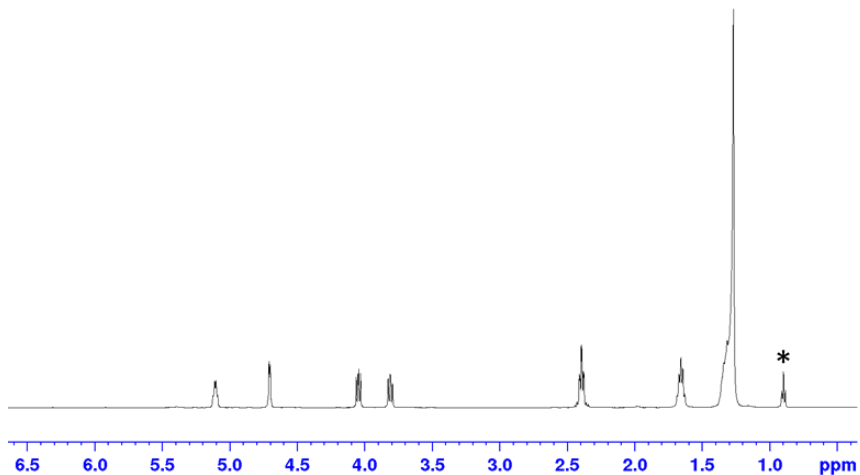

**Figure S27.**  $^1\text{H}$  NMR spectrum (in  $\text{CDCl}_3$  at  $25\text{ }^\circ\text{C}$ ) for HPE3 (under  $0.5\text{ MPa H}_2$ , run 40, Table 2). \*impurity

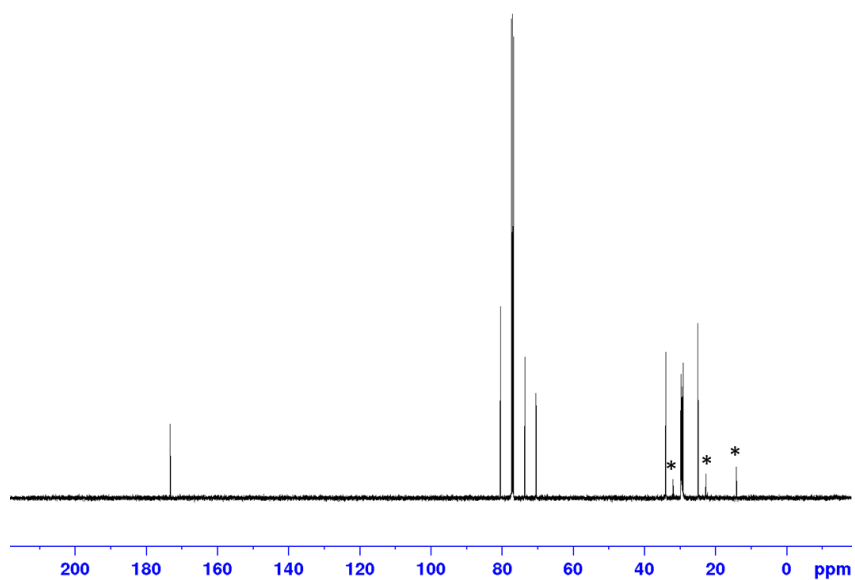

**Figure S28.**  $^{13}\text{C}$  NMR spectrum (in  $\text{CDCl}_3$  at  $25\text{ }^\circ\text{C}$ ) for HPE3 (under  $0.5\text{ MPa H}_2$  run 40, Table 2). \*impurity



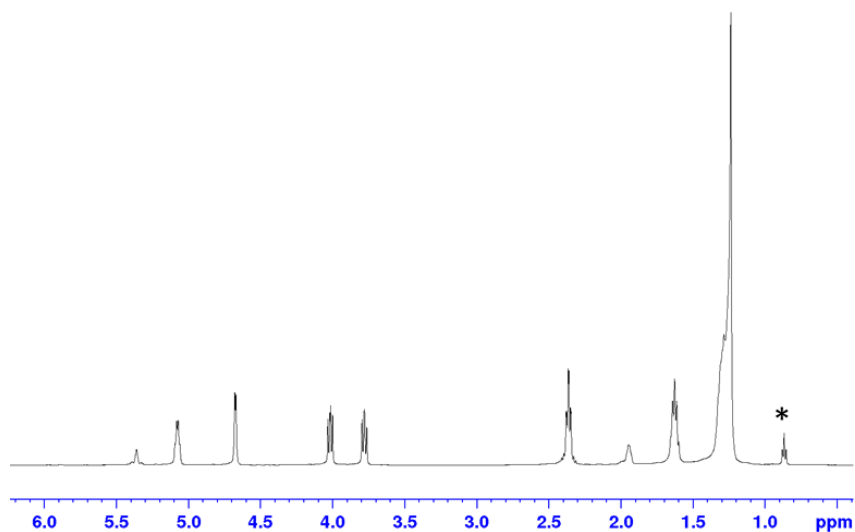

**Figure S29.**  $^1\text{H}$  NMR spectrum (in  $\text{CDCl}_3$  at  $25\text{ }^\circ\text{C}$ ) for attempted tandem hydrogenation of PE3 (under  $1.0\text{ MPa H}_2$  without  $\text{Al}_2\text{O}_3$ , run S9, Table S1-1). \*impurity

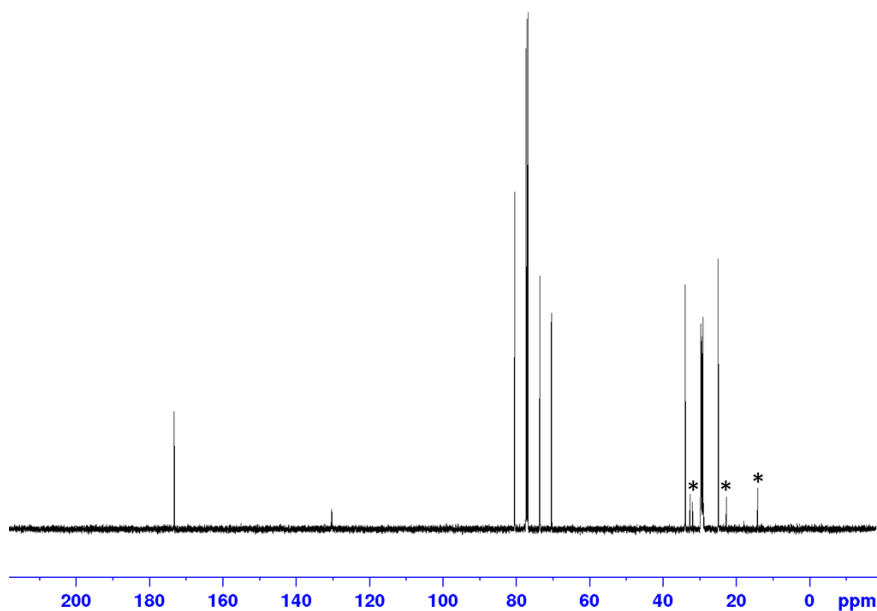

**Figure S30.**  $^{13}\text{C}$  NMR spectrum (in  $\text{CDCl}_3$  at  $25\text{ }^\circ\text{C}$ ) for attempted tandem hydrogenation of PE3 (under  $1.0\text{ MPa H}_2$  without  $\text{Al}_2\text{O}_3$ , run S9, Table S1-1). \*impurity

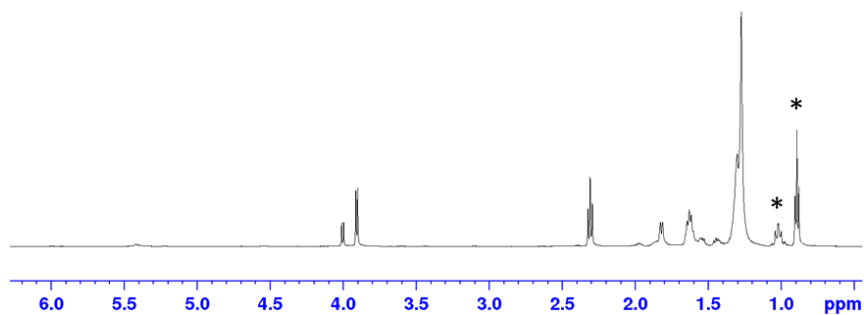

**Figure S31.**  $^1\text{H}$  NMR spectrum (in  $\text{CDCl}_3$  at  $25\text{ }^\circ\text{C}$ ) for HPE4 (run 43, Table 2). \*impurity

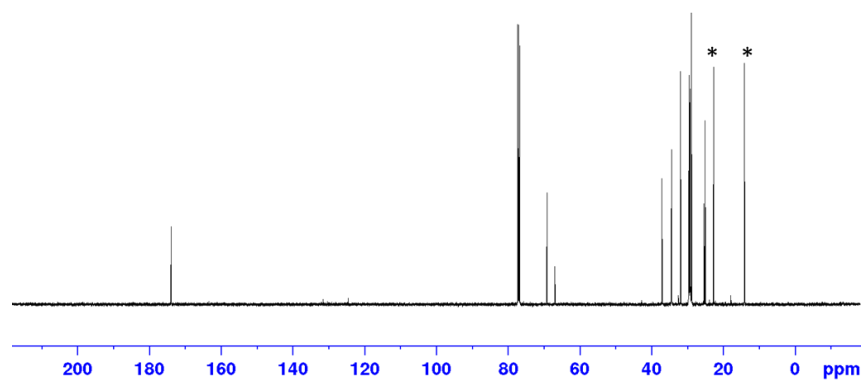

**Figure S32.**  $^{13}\text{C}$  NMR spectrum (in  $\text{CDCl}_3$  at  $25\text{ }^\circ\text{C}$ ) for HPE4 (run 43, Table 2). \*impurity

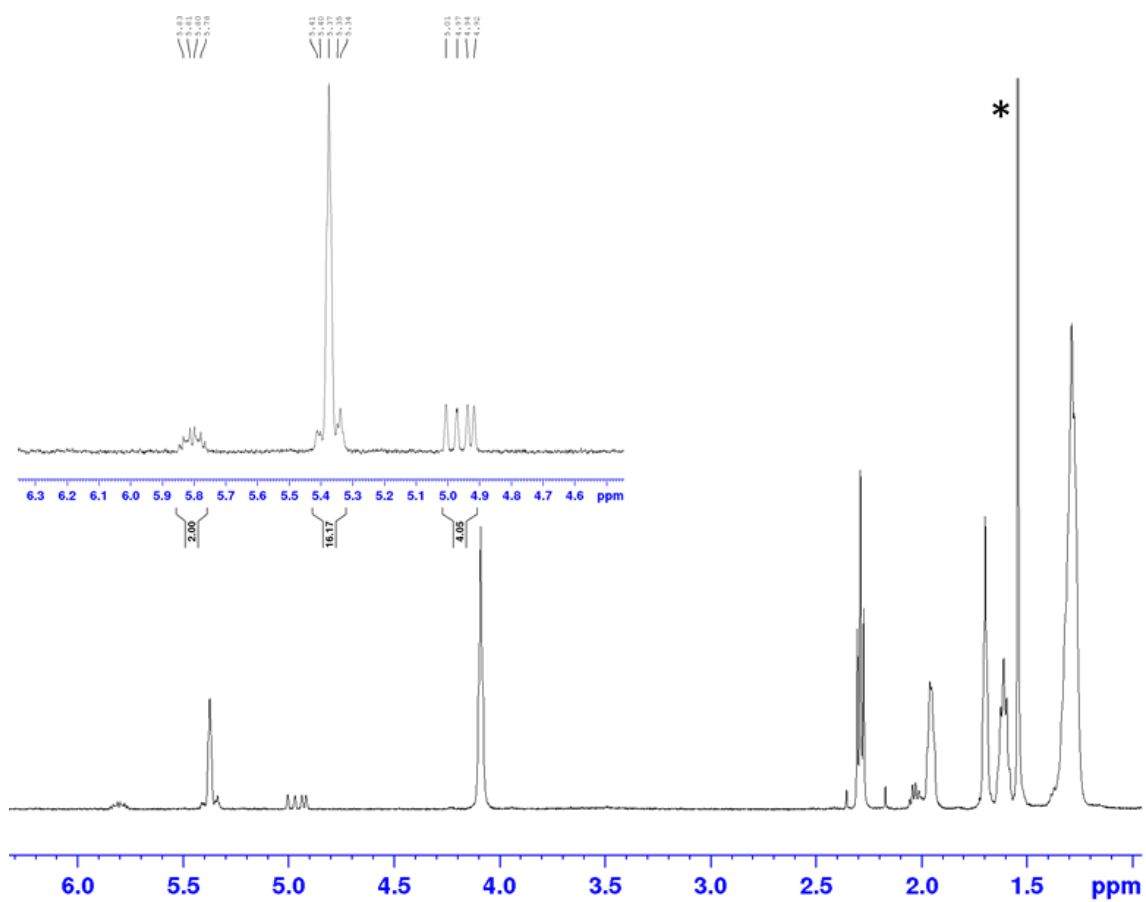

**Figure S33.** <sup>1</sup>H NMR spectrum (in CDCl<sub>3</sub> at 25 °C) for DPE1. \*impurity

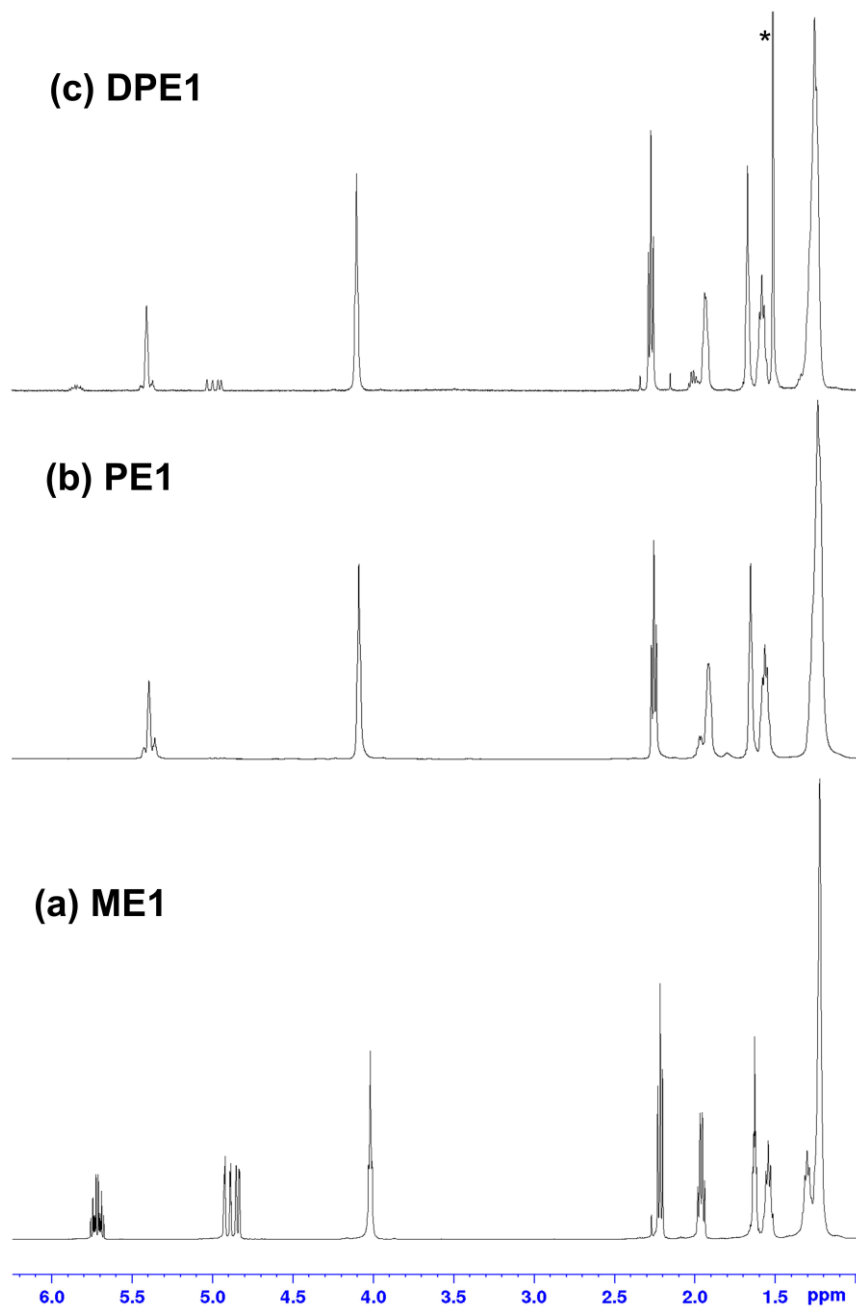

**Figure S34.**  $^1\text{H}$  NMR spectra (in  $\text{CDCl}_3$  at  $25^\circ\text{C}$ ) for (a) ME1, (b) PE1 (run3), and (c) DPE1.  
\*impurity

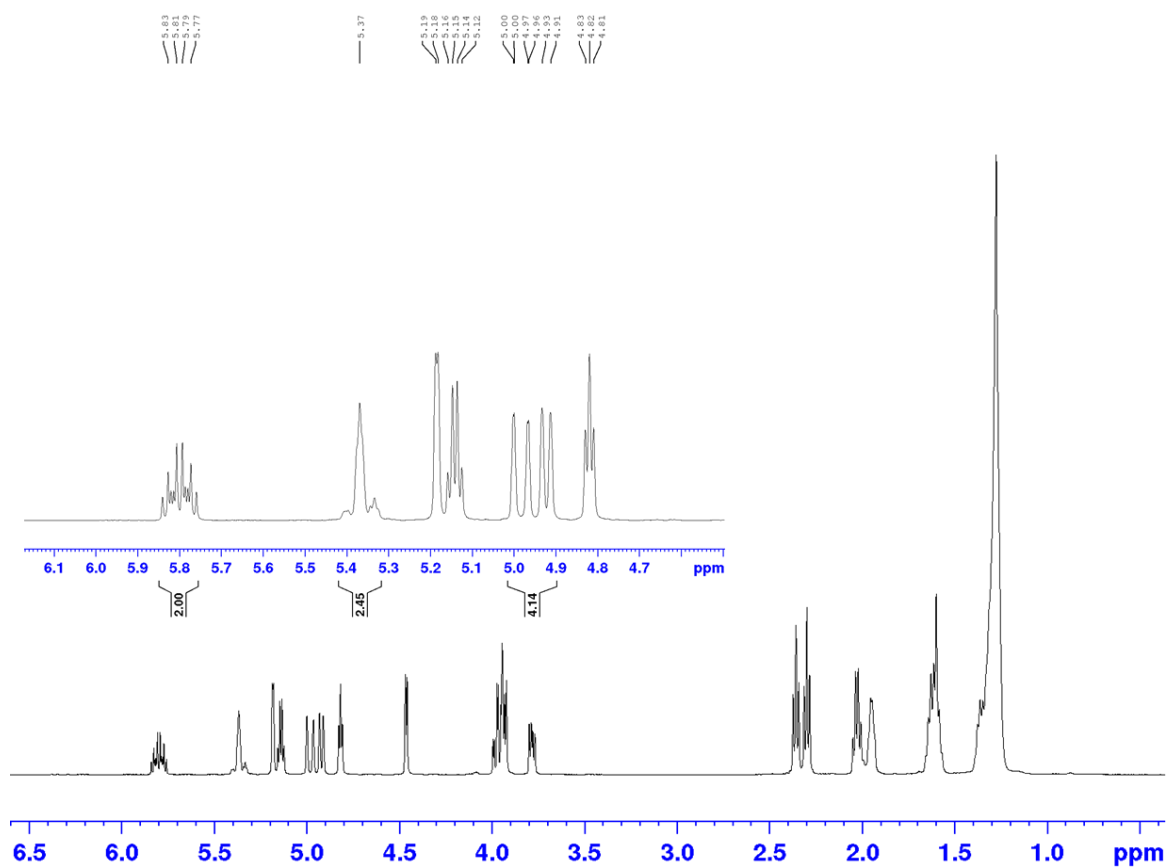

**Figure S35.**  $^1\text{H}$  NMR spectrum (in  $\text{CDCl}_3$  at 25 °C) for DPE2. \*impurity

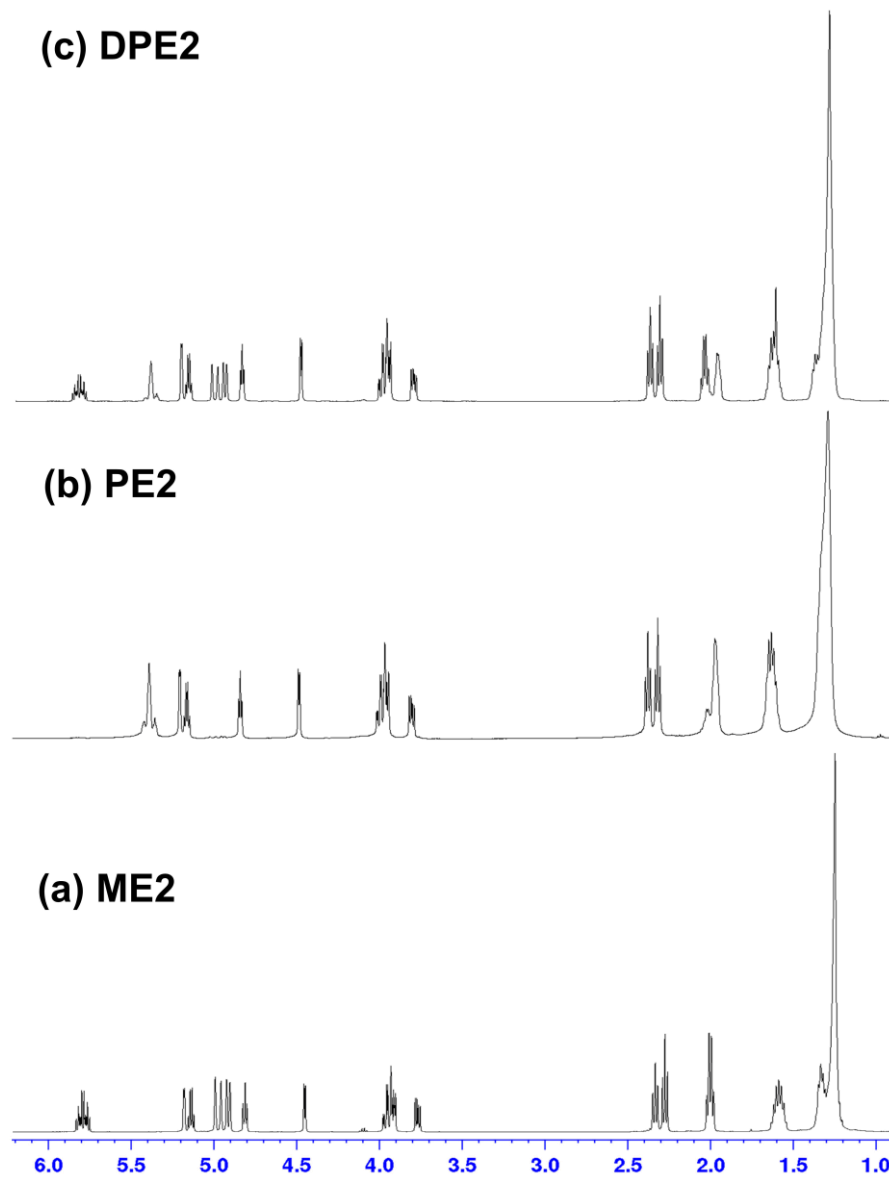

**Figure S36.**  $^1\text{H}$  NMR spectra (in  $\text{CDCl}_3$  at 25  $^\circ\text{C}$ ) for (a) ME2, (b) PE2 (run15), and (c) DPE2.

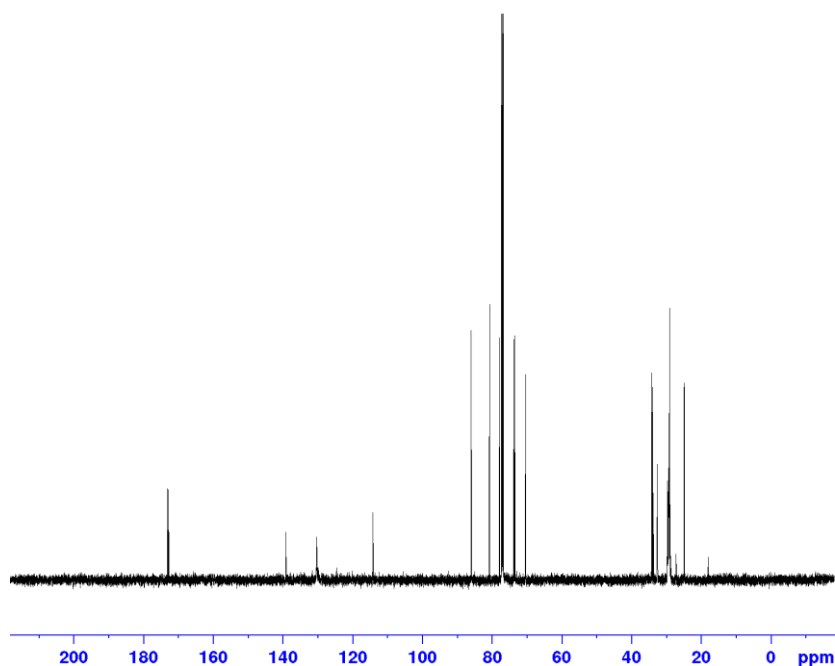

**Figure S37.**  $^{13}\text{C}$  NMR spectrum (in  $\text{CDCl}_3$  at  $25\text{ }^\circ\text{C}$ ) for DPE2. \*impurity

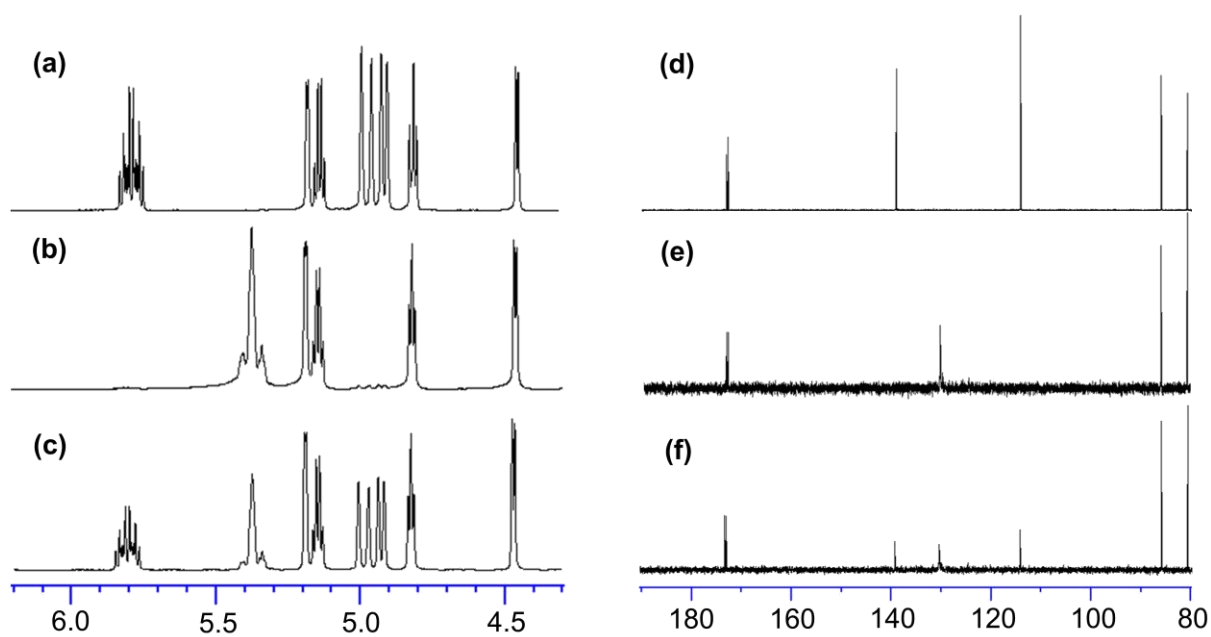

**Figure S38.** (left)  $^1\text{H}$  NMR spectra (in  $\text{CDCl}_3$  at  $25\text{ }^\circ\text{C}$ , expanded) for (a) ME2, (b) PE2 (run 15), and (c) DPE2. (right)  $^{13}\text{C}$  NMR spectrum (in  $\text{CDCl}_3$  at  $25\text{ }^\circ\text{C}$ , expanded) for (d) ME2, (e) PE2 (run15), and (f) DPE2.

### 3. Selected additional DSC thermograms

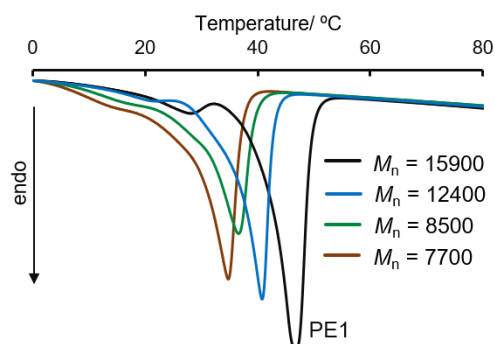

**Figure S39.** DSC thermograms for PE1s with different molecular weights by HG2.  $M_n = 15900$  (run 3, 24 h, HG 2.0 mol%,  $T_m = 46.9$  °C), 12400 (run 6, 24 h, HG 1.0 mol%,  $T_m = 40.9$  °C), 8500 (run 2, 12 h, HG 2.0 mol%,  $T_m = 36.6$  °C), 7700 (run 1, 6 h, HG 2.0 mol%,  $T_m = 34.8$  °C).

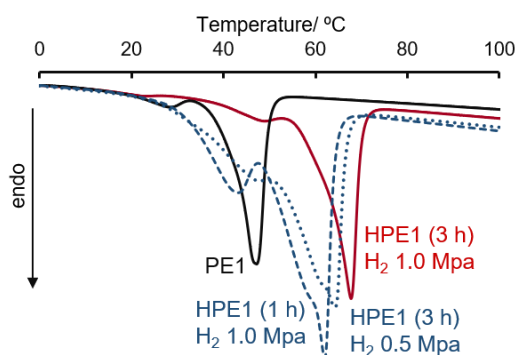

**Figure S40.** DSC thermograms for PE1 (run 3), HPE1 (run 32, prepared under  $H_2$  at 1.0 MPa for 3 h) by HG2, and samples with incomplete hydrogenation HPE1 (run S2, prepared under  $H_2$  at 1.0 MPa for 1 h; run S4 by G2, prepared under  $H_2$  at 0.5 MPa for 3 h) by HG2.

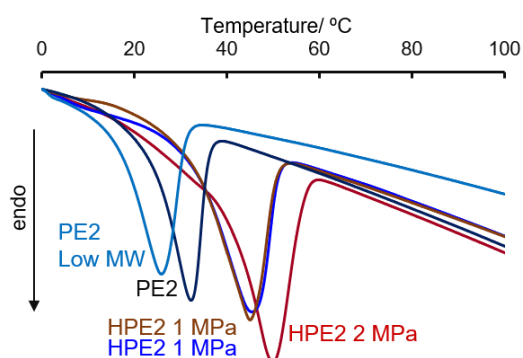

**Figure S41.** DSC thermograms for samples: PE2 LowMW (run 14), PE2 (run 15), HPE2 1 MPa (plotted in blue, run 34, prepared under  $H_2$  at 1.0 MPa) by HG2, HPE2 1 MPa (plotted in brown, run 35, prepared under  $H_2$  at 1.0 MPa) by G2, HPE2 2.0 MPa (run 36) prepared under  $H_2$  at 2.0 MPa by HG2.



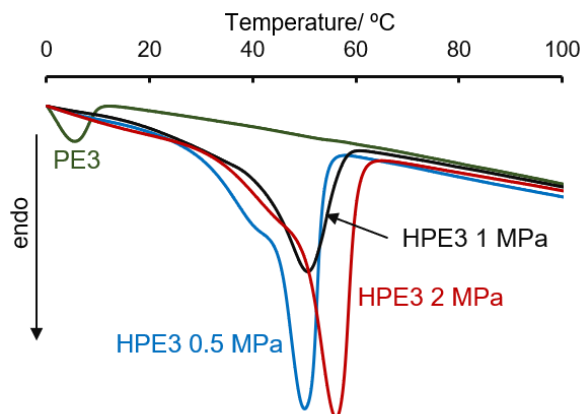

S2-1,

**Figure S42.** DSC thermograms for PE3 (run 23), HPE3 (run 40, prepared under H<sub>2</sub> at 0.5 MPa) by HG2, HPE3 (run 39, prepared under H<sub>2</sub> at 1.0 MPa) by HG2, HPE3 (run 41, prepared under H<sub>2</sub> at 2.0 MPa) by HG2.

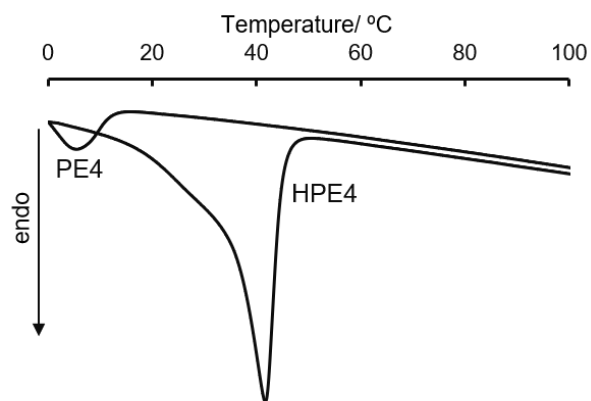

**Figure S43.** DSC thermograms for PE4 (run 30), and HPE4 (run 43, prepared under H<sub>2</sub> at 1.0 MPa) by HG2.

#### 4. Selected GPC traces before/after depolymerization.

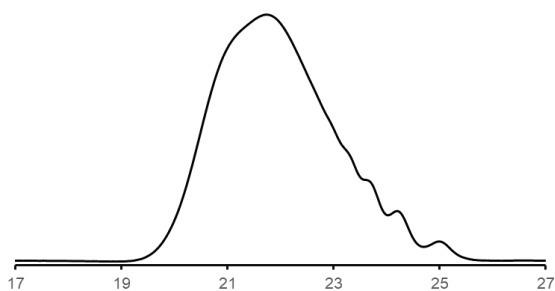

**Figure S44.** GPC trace for PE1 (run 46).  $M_n = 8400$ ,  $M_w/M_n = 1.62$ .

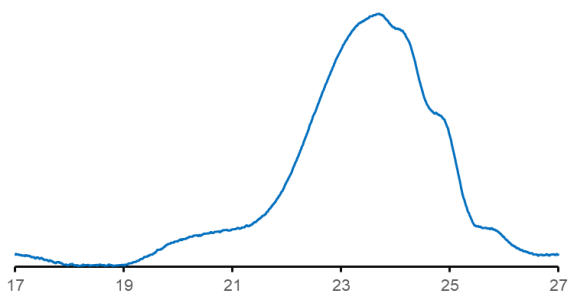

**Figure S45.** GPC trace for DPE1 (run 46).  $M_n = 1500$ ,  $M_w/M_n = 1.54$ .

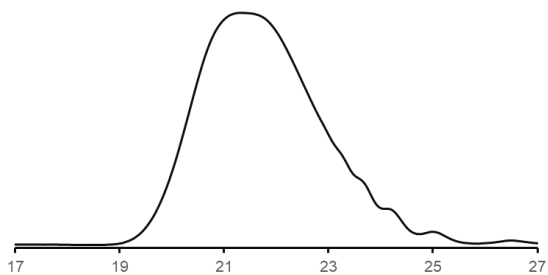

**Figure S46.** GPC trace for PE2 (run 49).  $M_n = 8500$ ,  $M_w/M_n = 1.54$ .

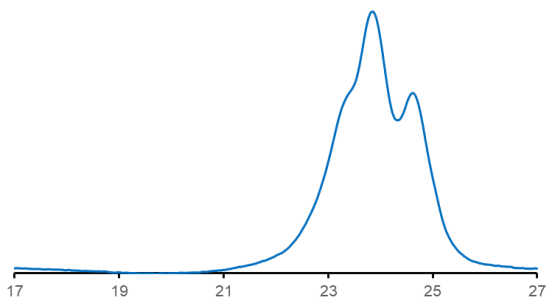

**Figure S47.** GPC trace for DPE2 (run 49).  $M_n = 1400$ ,  $M_w/M_n = 1.48$ .
